# Supplementary material for: Genetic Structure and Molecular Variability of Cucumber mosaic virus Isolates in the United States
Source: PubMed Central journal article supplement (PMC4012352; doi:10.1371/journal.pone.0096582), 2014-05-06
Supplement: pone.0096582.s001.pdf [file pone.0096582.s001.pdf]

## Supporting information

**Table S1. Accession numbers and countries of origin of reference isolates and out-groups.**

| Strain | Accession numbers |          |          | Origin        | Subgroup |
|--------|-------------------|----------|----------|---------------|----------|
|        | RNA1              | RNA2     | RNA3     |               |          |
| Fny    | D00356            | D00355   | D10538   | United States | IA       |
| Y      | D12537            | D12538   | D12499   | Japan         | IA       |
| O      | -                 | D10209   | D00385   | Japan         | IA       |
| Mf     | AJ276479          | AJ276480 | AJ276481 | South Korea   | IA       |
| Leg    | D16403            | D16406   | D16405   | Japan         | IA       |
| Nt9    | D28778            | D28779   | D28780   | Taiwan        | IB       |
| Tfn    | Y16924            | Y16925   | Y16926   | Italy         | IB       |
| IA     | AB042292          | AB042293 | AB042294 | Indonesia     | IB       |
| Ix     | U20220            | U20218   | U20219   | Philippines   | IB       |
| SD     | AF071551          | D86330   | AB008777 | China         | IB       |
| Q      | X02733            | X00985   | M21464   | Australia     | II       |
| LS     | AF416899          | AF416900 | AF127976 | United States | II       |
| LY     | AF198101          | AF198102 | AF198103 | Australia     | II       |
| Trk7   | AJ007933          | AJ007934 | L15336   | Hungary       | II       |
| S      | Y10884            | Y10885   | U37227   | South Africa  | II       |
| 2AII   | -                 | -        | AJ271416 | United States | IB       |
| OHW    | -                 | -        | U31220   | United States | IB       |
| HW2    | -                 | -        | U31219   | United States | IB       |
| PSV    | U15728            | U15729   | U15730   | United States | -        |
| TAV    | D10044            | D10663   | AJ277268 | Australia     | -        |
